# Supplementary material
Source: Research Square preprint supplement (doi:10.21203/rs.3.rs-9257021/v1)
Supplement: Supplementary file 1 [file 933a23ed2e9cdc01adfc5e60.docx]

**Supplementary Materials**


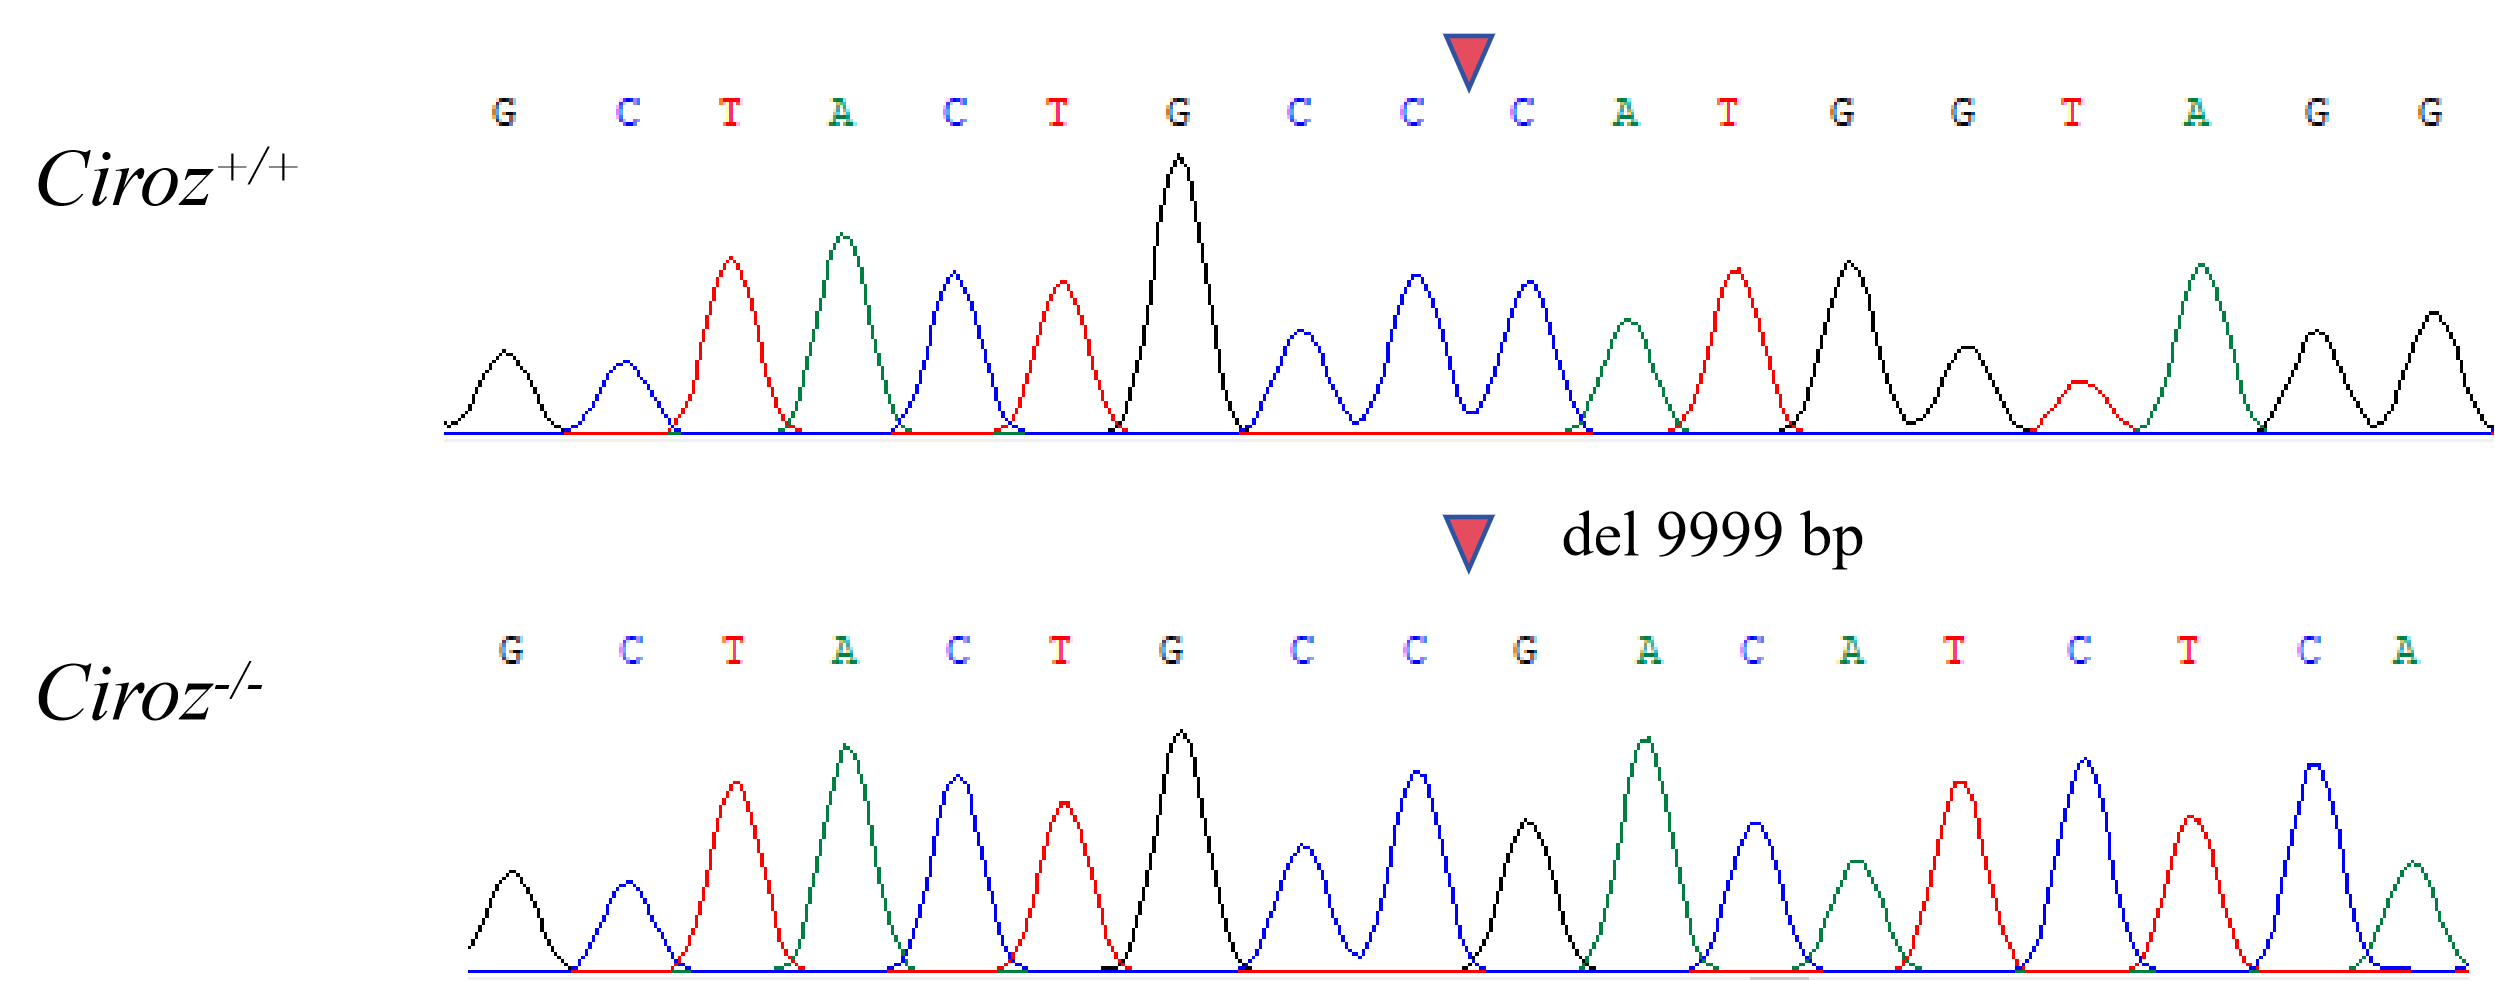


**Figure S1. Sanger sequencing of *Ciroz+/+* and *Ciroz-/-* mice.**

Sanger DNA sequencing confirms *Ciroz* gene knockout in mice, with 9999 base pairs (bp) missing.


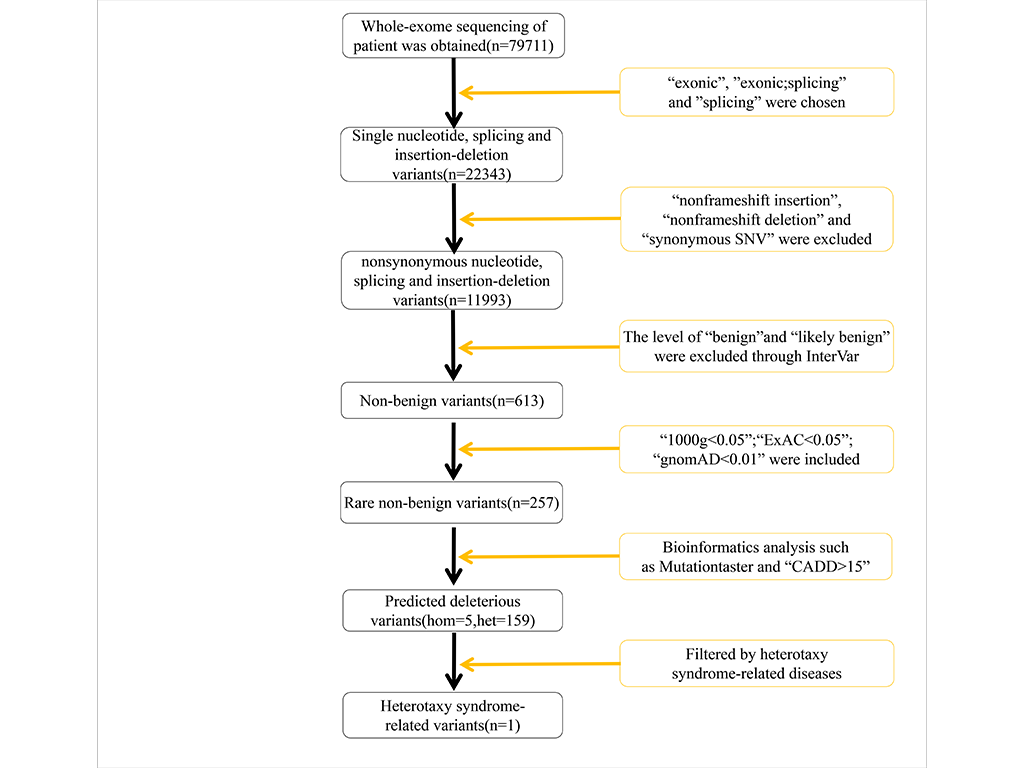


**Figure S2. The procedure of variant identification.**

Abbreviation: hom= homozygous variants, het= heterozygous variants.


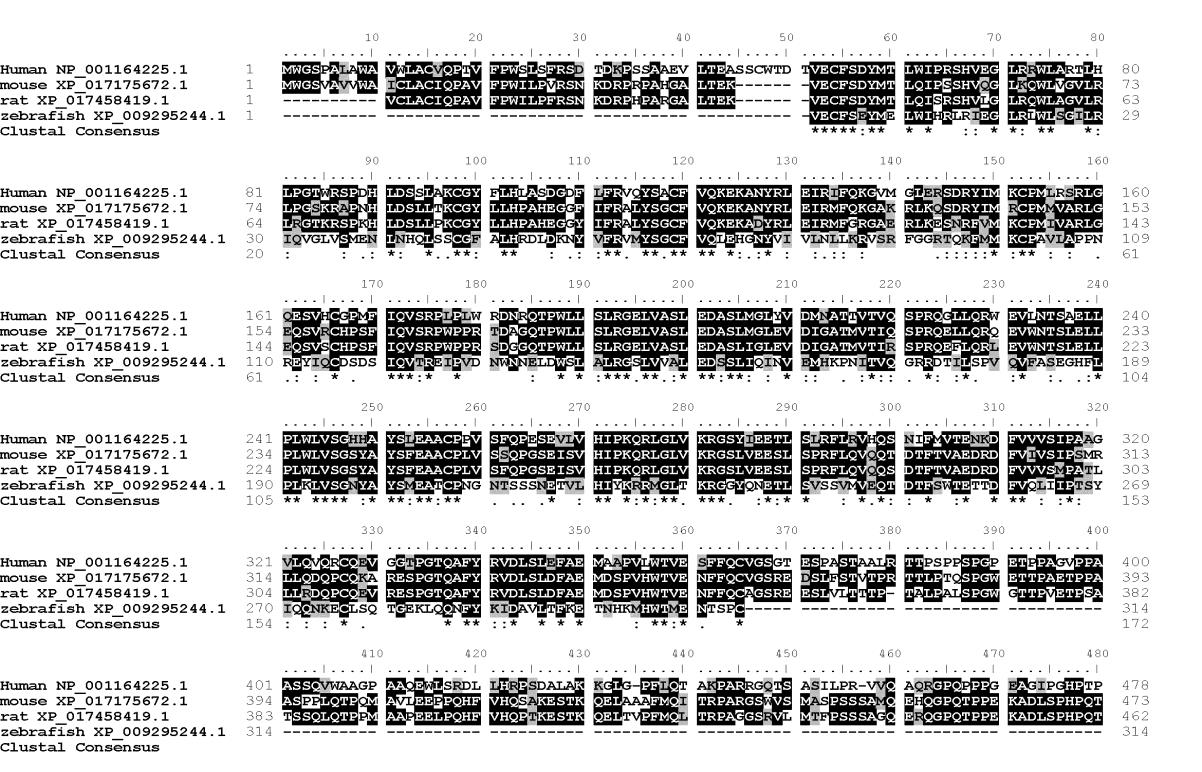


**Figure S3. Protein sequence alignment of CIROZ orthologs from Homo sapiens, Rattus norregicus, Mus musculus and Danio rerio.**

Asterisks (*) indicate amino acid residues conserved across all four species. Residues conserved in three species are shown as white text on black background, while residues conserved in two species are shaded in gray. The shading intensity reflects the degree of conservation, with darker shading indicating higher conservation. Dashes represent gaps introduced to optimize the alignment.
