# Supplementary material
Source: Research Square preprint supplement (doi:10.21203/rs.3.rs-9257021/v1)
Supplement: Supplementary file 2 [file cecf943eeaaab815a9cdfe0f.xlsx]

## Sheet: Table S1
Table S1. Primers used for proband with CIROZ variant
PCR Primer names	Primer sequences (5'-3')
CIROZ-F1	TGCCTCCTGGCCTAGATTAT
CIROZ-R1	CATGTGAGCCGTCTTCTCTTAC
CIROZ-F2	AAGAAATGTGGAGGGCAGAG
CIROZ-R2	GGTCCAGGGAGTGAAACATT

## Sheet: Table S2
Table S2. Primers used for genotyping the Ciroz gene in mice
PCR Primer names	Primer sequences (5'-3')
mCiroz-F1	GCTCCCTCATCAATAATGACTTAATCC
mCiroz-R1	CACTCCTACCACTGAGTTGCTTTG
mCiroz-F2	GCTCCCTCATCAATAATGACTTAATCC
mCiroz-R2	TTTACCTGTCAGAGCTCCATGC

## Sheet: Table S3
Table S3. Primers used for RT-qPCR
RT-qPCR Primer names	Primer sequences (5'-3')
qCiroz-F	ATGTGGTTACCTCTTGCATCCT
qCiroz-R	CAACCTTTTCGCCCCTTTTTG
qGapdh-F	AGGTCGGTGTGAACGGATTTG
qGapdh-R	GGGGTCGTTGATGGCAACA
qWnt3a-F	CTCCTCTCGGATACCTCTTAGTG
qWnt3a-R	CCAAGGACCACCAGATCGG
qSox2-F	GCGGAGTGGAAACTTTTGTCC
qSox2-R	CGGGAAGCGTGTACTTATCCTT
qNanog-F	CACAGTTTGCCTAGTTCTGAGG
qNanog-R	GCAAGAATAGTTCTCGGGATGAA
qBrachyury-F	CTCGGATTCACATCGTGAGAG
qBrachyur-R	AAGGCTTTAGCAAATGGGTTGTA
qNodal-F	AGACGTTCACCGTCATTCCTT
qNodal-R	CCAACACTTTTCTGCTCGACT
qLefty2-F	CAGCCAGAATTTTCGAGAGGT
qLefty2-R	CAGTGCGATTGGAGCCATC
qPitx2-F	ACCCCGGCTATTCGTACAAC
qPitx2-R	GGACAGGGGATTGACGTTCAT
qDand5-F	CTGTCCTTTGTTCAGGTGATCTC
qDand5-R	CCGAGGGGAGGCTAATTGG
